# Supplementary material
Source: Elsevier journal article supplement (https://www.sciencedirect.com/science/article/pii/S0021755720302254)
Supplement: mmc1 [file S0021755720302254:mmc1.docx]

JPED-D-20-00249 – Supplementary Material

#### **Table S1 - Demographic and clinical features of patients with MIS-C according to the presence of Kawasaki-like syndrome and incomplete Kawasaki disease, acute cardiac dysfunction, toxic shock syndrome and macrophagic activation syndrome.**

| Characteristic | Kawasaki-like and incomplete-Kawasaki disease  n (%) | Acute cardiac dysfunction  n (%) | Toxic shock syndrome  n (%) | Macrophagic activation syndrome  n (%) |
| --- | --- | --- | --- | --- |
| Total | 42 (75) | 10 (18) | 3 (5) | 1 (2) |
| Age, median (IQR), years. | 6.2 (2.7-10.0) | 9.0 (2.7-14.4) | 3.8 (3.0-5.4) | 1 (2) |
| Sex |  |  |  |  |
| Male | 32 (76) | 5 (50) | 1 (33) | 1 (100) |
| Female | 10 (24) | 5 (50) | 2 (67) | 0 (0) |
| Ethnicitya |  |  |  |  |
| White | 18 (46) | 1 (12) | 1 (33) | 1 (100) |
| Non-white | 21 (54) | 7 (88) | 2 (67) | 0 (0) |
| Comorbidities |  |  |  |  |
| Yes | 9 (21) | 2 (20) | 0 (0) | 0 (0) |
| No | 33 (79) | 8 (80) | 3 (100) | 1 (100) |
| MIS-C specific treatment |  |  |  |  |
| Immunoglobulin | 39 (93) | 7 (70) | 3 (100) | 1 (100) |
| Corticosteroids | 25 (60) | 3 (30) | 2 (67) | 1 (100) |
| Clexane (enoxaparin) | 24 (57) | 3 (30) | 1 (33) | 1 (100) |
| Acetylsalicylic acid (AAS) | 12 (39) | 3 (43) | 2 (100) | 0 (0) |
| Respiratory support |  |  |  |  |
| Oxygen therapy, only | 10 (33) | 3 (38) | 1 (33) | 0 (0) |
| Non-invasive ventilation, only | 1 (3) | 1 (12) | 1 (33) | 0 (0) |
| Invasive mechanical ventilation | 4 (10) | 1 (10) | 1 (33) | 0 (0) |
| Days of use, median (IQR) | 5.0 (4.5-5.5) | 7.0 (7.0-7.0) | 5.0 (5.0-5.0) | 0 (0) |
| ARDS diagnosis | 1 (3) | 0 (0) | 1 (33) | 0 (0) |
| PICU length of stay, days, median (IQR) | 6 (5-11) | 5.5 (4.3-12.5) | 6 (5-14) | 22 |
| Outcome |  |  |  |  |
| Discharge | 41 (95) | 8 (80) | 3 (100) | 1 (100) |
| Death | 0 (0) | 1 (10) | 0 (0) | 0 (0) |
| Transfer to other hospital | 1 (2.5) | 1 (10) | 0 (0) | 0 (0) |

#### AAS, acetylsalicylic acid; IQR, interquartile range; PICU, pediatric intensive care unit

a Missing value (five patients without ethnicity described)

**Table S2 - List of members of the Brazilian Research Network in Pediatric Intensive Care (BRnet-PIC) and their role in the present study.**

| **Name** | **Primary affiliation** | **Role in study** |
| --- | --- | --- |
| Arnaldo Prata-Barbosa | Instituto D’Or de Pesquisa e Ensino (IDOR), Rio de Janeiro, RJ | Senior Investigator, Executive Committee |
| José Colleti Jr | Hospital Assunção, São Bernardo do Campo, SP | Co-Investigator, Executive Committee |
| Cristian Tedesco Tonial | Brazilian Research in Pediatric Intensive Care | Co-Investigator, Executive Committee |
| Antonio José Ledo Alves da Cunha | Universidade Federal do Rio de Janeiro (UFRJ), Rio de Janeiro, RJ | Co-Senior Investigator |
| Fernanda Lima-Setta | Instituto D’Or de Pesquisa e Ensino (IDOR), Rio de Janeiro, RJ | Principal Investigator |
| Maria Clara de Magalhães-Barbosa | Instituto D’Or de Pesquisa e Ensino (IDOR), Rio de Janeiro, RJ | Co-Principal Investigator |
| Gustavo Rodrigues dos Santos | Instituto D’Or de Pesquisa e Ensino (IDOR), Rio de Janeiro, RJ | Investigator, Data Committee |
| Carlos Eduardo Raymundo | Instituto D’Or de Pesquisa e Ensino (IDOR), Rio de Janeiro, RJ | Co-Investigator, Data Committee |
| Vanessa Soares Lanziotti | Universidade Federal do Rio de Janeiro (UFRJ), Rio de Janeiro, RJ | Investigator, Writing Committee |
| Roberta Esteves Vieira de Castro | Universidade do Estado do Rio de Janeiro (UERJ), Rio de Janeiro, RJ | Investigator, Writing Committee |
| Jaqueline Rodrigues Robaina | Instituto D’Or de Pesquisa e Ensino (IDOR), Rio de Janeiro, RJ | Co-Investigator, Logistic Center |
| Mariana Barros Genuíno de Oliveira | Instituto D’Or de Pesquisa e Ensino (IDOR), Rio de Janeiro, RJ | Co-Investigator, Logistic Center |
| Elaine Augusta Das Neves Figueiredo | Hospital Pediátrico Unimed, Belém, PA | Investigator, Center Coordinator |
| Melissa de Lorena Jacques | Hospital Quinta D’Or, Rio de Janeiro, RJ | Investigator, Center Coordinator |
| Raquel de Seixas Zeitel | Hospital Universitário Pedro Ernesto, Rio de Janeiro, RJ | Investigator, Center Coordinator |
| Rodrigo Moulin Silva | Hospital Universitário Pedro Ernesto, Rio de Janeiro, RJ | Co-Investigator |
| Camila Furtado Guedes Pinto | Hospital Universitário Pedro Ernesto, Rio de Janeiro, RJ | Co-Investigator |
| Roberto Sapolnik | Hospital São Rafael, Salvador, BA | Investigator, Center Coordinator |
| Ana Paula Novaes Bellinat | Hospital Martagão Gesteira, Salvador, BA | Investigator, Center Coordinator |
| Thiago Peres da Silva | Hospital Real D’Or, Rio de Janeiro, RJ | Investigator, Center Coordinator |
| Felipe Rezende Caino de Oliveira | Hospital Alvorada Moema, São Paulo, SP | Investigator, Center Coordinator |
| Bárbara Carvalho dos Santos Reis | Complexo Hospitalar de Niteroi, Niterói, RJ | Investigator, Center Coordinator |
| Natália Almeida de Arnaldo Silva Rodrigues Castro | Hospital Da Criança E Maternidade FMSJRP, São José Do Rio Preto, SP | Investigator, Center Coordinator |
| João Henrique Corbas de Macedo | Hospital Copa D’Or, Rio de Janeiro, RJ | Investigator, Center Coordinator |
| Ana Carolina Cabral Pereira Scarlato | Hospital Rios D’Or, Rio de Janeiro, RJ | Investigator, Center Coordinator |
| Paula Marins Riveiro | Hospital Caxias D’Or, Duque De Caxias, RJ | Investigator, Center Coordinator |
| Isabele Coelho Fonseca da Mota | Hospital Jutta Batista, Rio de Janeiro, RJ | Investigator, Center Coordinator |
| Vivian Botelho Lorenzo | Hospital Couto Maia, Salvador, BA | Investigator, Center Coordinator |
| Natália Martins Lima de Lucena | Hospital Monte Klinikum, Fortaleza, CE | Investigator, Center Coordinator |
| Vladia Verusca Sampaio De Almeida | Hospital Monte Klinikum, Fortaleza, CE | Co-Investigator |
| Zina Maria Almeida de Azevedo | Instituto Fernandes Figueira, Rio de Janeiro, RJ | Investigator, Center Coordinator |
